# Supplementary material
Source: ML conference proceedings conference paper supplement (https://openaccess.thecvf.com/content/WACV2022/html/Mathew_InfographicVQA_WACV_2022_paper.html)
Supplement: Supplementary file 1 [file Mathew_InfographicVQA_WACV_2022_supplemental.pdf]

# InfographicVQA

## (Supplementary material)

Minesh Mathew<sup>1</sup>

Viraj Bagal<sup>2\*</sup>

Rubèn Tito<sup>3</sup>

Dimosthenis Karatzas<sup>3</sup>

Ernest Valveny<sup>3</sup>

C.V. Jawahar<sup>1</sup>

<sup>1</sup>CVIT, IIIT Hyderabad, India

<sup>1</sup>IISER Pune, India

<sup>3</sup>Computer Vision Center, UAB, Spain

minesh.mathew@research.iiit.ac.in, viraj.bagal@students.iiserpune.ac.in, rperez@cvc.uab.cat

### A. Data collection

This section provides details on how we collected infographics from internet, cleaned it and the way we collect questions and answers on these images.

#### A.1. Collecting images and de-dupeing

Images in the dataset are sourced from internet. Initially we downloaded more than 10K images for the search query “infographics” using Google and Bing image search engines. The downloaded images were first de-duped using a Perceptual Hashing approach implemented in *imagededup* library [5] helping us remove nearly 2000 duplicates. This helped to reduce the number of images for the second round of de-duplication that involved use of a commercial OCR. In this round, we compared the images using Jaccard similarity of the text tokens spotted on the images using the Amazon Textract OCR [1]. After two rounds of de-duplication, around 7K images were left. These were added to the annotation system for question-answer annotation.

#### A.2. Question-answer annotation

Here we present additional details of the annotation process.

##### Annotation scheme and selection of workers.

Initially we had hosted a pilot annotation on a crowdsourcing platform for collecting question-answer pairs on infographics. But more than 40% of the question-answer pairs collected during the pilot annotation were noisy. We realized that some of the requirements were not easy to understand from written instructions. For example, the kind of question-answers that are allowed—only questions whose answer sources are one of the four specified types—is better understood when explained using examples. Consequently we decided to use an internal, web-based tool for the an-

notation and hired workers with whom we could interact closely.

To select the workers, we reached out to individuals looking for annotation-type jobs through mailing lists and other online groups. Interested applicants were invited to join a 90 minute webinar explaining the process and all the requirements. During the webinar we explained them each of the instructions with many examples. We showed them examples for the kind of questions that are allowed and examples for different question-answer types. Following the webinar, the applicants were asked to take an online quiz to assess how well they understood the process and the policies. Based on the quiz scores we selected 13 workers for the annotation task. The selected workers were called for another round of webinar where we discussed the answer key for the quiz and clarified their doubts. The workers were added to an online forum so that they could post their queries related to the annotation in the forum. They were encouraged to post questions with screenshots from the tool whenever in doubt. They would keep the particular image in pending and move on to other images in the queue, until one of the authors give a reply to the question they raised. This way we could reduce annotation errors drastically. Figure A.1 shows a screenshot of our web-based annotation tool that shows the interface from which a worker picks the next image for annotation, while having a few documents in pending.

##### Annotation tool

Annotation of InfographicVQA was organized in two stages. In the first stage, question-answer pairs were collected on the infographics. Workers were allowed to reject an image if it is not suitable. See Table A.1 for instructions on when to reject an image. After collecting more than 30K questions and their answers, we stopped the first round of annotation, as we were aiming for a dataset with 30K questions in total. We split this data into train, validation and test splits so that the splits roughly have 80, 10 and 10 percentage of the total questions respectively. Figure A.2 shows a

\*Work done during an internship at IIIT Hyderabad.

screenshot from the stage 1 of the annotation.

Inspired by the the SQuAD dataset annotation, we included a second stage in the annotation process to collect additional answers for questions in the validation and test split. Hence only images from validation and test splits were sent through this stage. In this stage, a worker was shown an image and were asked to answer the questions that had been added on the image in the first stage (answers entered in the first stage were not shown). Finally, we retain all the unique answers (i.e, unique strings after converting all answers to lower case) entered for a question. Hence a question can have more than 1 valid answer. We made sure that second stage was done by a worker different from the one who collected questions and answers on the same image in the first stage. The workers were also allowed to mark a question as "can't answer" if they are not able to find an answer for the question based on the information present in the image. Around 1.9% questions were marked so and those were removed from the dataset. As mentioned in subsection 3.2 in the main paper, in the second stage, workers were also required to assign question-answer types based on answer source, evidence and operation for each question. Figure A.3 shows a screenshot from stage 2 of the annotation.

Written instructions for both stages of the annotation that we shared with the workers are given in Table A.1.

## B. Additional Statistics and Analysis of InfographicVQA dataset

In this section we provide additional statistics and analysis of the InfographicVQA dataset. This section extends Section 3 in the main paper.

To analyze the topics covered by images in InfographicVQA, we used the Latent Dirichlet Allocation (LDA) [3] model. We used the LDA implementation in Gensim library [10]. Since our dataset comprises images, the text recognized from the images using an OCR are used for the topic modelling. Table B.1 shows that images in InfographicVQA dataset cover a wide range of topics such as energy, war, health and social media. In Figure B.1 we show a visualization of the top 20 topics in the dataset, visualized using the pyLDAvis tool [7].

In Figure B.2, we plot the distribution of question lengths for questions in InfographicVQA and similar datasets — TextVQA [12], ST-VQA [2], DocVQA [8] and VisualMRC [13]. Similar plots for answer lengths and number of OCR tokens are shown in Figure B.3 and Figure B.4 respectively.

Top-15 questions in the dataset based on occurrence frequency are shown in Figure B.5. Top-15 answers and top-15 non-numeric answers are shown in Figure B.6 and Figure B.7 respectively.

For TextVQA dataset, for all statistics, we use only the publicly available data splits. For statistics and analysis involving OCR tokens, for InfographicVQA we use OCR tokens spotted by Amazon Textract OCR (these OCR results are publicly available to download along with the dataset). For TextVQA and ST-VQA we use OCR tokens provided as part of data made available in MMF framework [11]. For DocVQA and VisualMRC we use OCR recognition results made available as part of the official data releases.

## C. More details on experiments

### C.1. Evaluation

Since more than 70% of the answers in the dataset are taken verbatim from the text present in the image, we decided to keep the evaluation protocol same as the one used for ST-VQA [2] and DocVQA [8] benchmarks. These benchmarks where answers are compulsorily extracted from the text on the images, authors propose to use Average Normalized Levenshtein Similarity (ANLS) as the primary evaluation metric. The metric was originally introduced for evaluating VQA on ST-VQA. As the authors of ST-VQA state, ANLS "responds softly to answer mismatches due to OCR imperfections".

The below definition for ANLS is taken from ST-VQA paper.

In Equation C.1  $N$  is the total number of questions and  $M$  the number of GT answers per question.  $a_{ij}$  are the the ground truth answers where  $i = \{0, \dots, N\}$ , and  $j = \{0, \dots, M\}$ , and  $o_{q_i}$  the predicted answer for the  $i^{th}$  question  $q_i$ . Then, the final score is defined as:

$$ANLS = \frac{1}{N} \sum_{i=0}^N \left( \max_j s(a_{ij}, o_{q_i}) \right) \quad (C.1)$$

$$s(a_{ij}, o_{q_i}) = \begin{cases} (1 - NL(a_{ij}, o_{q_i})) & \text{if } NL(a_{ij}, o_{q_i}) < \tau \\ 0 & \text{if } NL(a_{ij}, o_{q_i}) \geq \tau \end{cases}$$

where  $NL(a_{ij}, o_{q_i})$  is the Normalized Levenshtein distance between the lower-cased strings  $a_{ij}$  and  $o_{q_i}$  (notice that the normalized Levenshtein distance is a value between 0 and 1). We then define a threshold  $\tau = 0.5$  to filter NL values larger than the threshold. The intuition behind the threshold is that if an output has a normalized edit distance of more than 0.5 to an answer, it is highly unlikely that the answer mismatch is due to OCR error.

In addition to ANLS, we also evaluate the performance in terms of accuracy. It is the percentage of questions for which the predicted answer match exactly with at least one of the ground truth answers. For both the ANLS and accuracy computation, the ground truth answers and the predicted answers are converted to lowercase.

## C.2. Experimental setup for M4C

We trained our models on 4, NVIDIA RTX 2080Ti GPUs. The maximum number of decoding steps used for the iterative answer prediction module is 12. The multi-modal transformer block had 4 transformer layers, with 12 attention heads. The dropout ratio for the transformer block was 0.1. We used Adam optimizer. The batch size was 128 and we trained the models for 24,000 iterations. We used a base learning rate of  $1e - 04$ , a warm-up learning factor of 0.2 and 2,000 warm-up iterations. We used a learning rate decay of 0.1. Gradients were clipped when  $L^2$  norm exceeds 0.2.

## C.3. Experimental setup for LayoutLM

**Preparing QA data for finetuning LayoutLM.** We fine-tune LayoutLM model for SQuAD [9] style extractive QA wherein start and end tokens of a span is predicted. For this, we need to prepare LayoutLM training data in SQuAD-style format where answer is marked as a span of the text present on the infographic image. We serialize the OCR tokens spotted on each image in the natural reading order. Then we check if a ground truth answer can be found as a subsequence of the serialized text. In cases where an answer has multiple subsequence matches with the serialized text, the first match is taken as the answer span. If no match is found, the particular question is not used for finetuning the model. This approach of finding answer spans from answers is inspired by the similar approach used by authors of TriviaQA [6]. The same has been used by authors of DocVQA as well for finetuning a BERT QA model for span prediction. Unlike substring matching in TriviaQA we look for subsequence matches as proposed by DocVQA authors. Substring matches can result in many false matches. Since InfographicVQA has lot of numeric answers false matches are even more likely. For example if the answer is “3” (the most common answer in InfographicVQA dataset), if we go by substring matching, it will match with a 3 in ‘300’ and ‘3m’.

## D. Additional Qualitative Examples

In Figure D.1– Figure D.7, we show qualitative examples covering multiple types of answers, evidences and operations which we discuss in Section 3.3 of the main paper. These results supplement the qualitative results we show in Figure 7 in the main paper.

## References

- [1] Amazon Textract. <https://aws.amazon.com/textract/>. Accessed: 2021-08-16.
- [2] Ali Furkan Biten, Ruben Tito, Andres Mafla, Lluís Gomez, Marçal Rusinol, Ernest Valveny, C.V. Jawahar, and Dimosthenis Karatzas. Scene Text Visual Question Answering. In *ICCV*, 2019.
- [3] David M. Blei, Andrew Y. Ng, and Michael I. Jordan. Latent dirichlet allocation. *J. Mach. Learn. Res.*, 3:993–1022, 2003.
- [4] Michael A. A. Cox and Trevor F. Cox. *Multidimensional Scaling*, pages 315–347. Springer Berlin Heidelberg, 2008.
- [5] Tanuj Jain, Christopher Lennan, Zubin John, and Dat Tran. Imagededup. <https://github.com/idealol/imagededup>, 2019.
- [6] Mandar Joshi, Eunsol Choi, Daniel Weld, and Luke Zettlemoyer. TriviaQA: A Large Scale Distantly Supervised Challenge Dataset for Reading Comprehension. In *ACL*, 2017.
- [7] Ben Mabey. pyLDavis. <https://github.com/bmabey/pyLDavis>, 2021.
- [8] Minesh Mathew, Dimosthenis Karatzas, and C. V. Jawahar. DocVQA: A Dataset for VQA on Document Images. In *WACV*, 2020.
- [9] Pranav Rajpurkar, Jian Zhang, Konstantin Lopyrev, and Percy Liang. SQuAD: 100,000+ Questions for Machine Comprehension of Text. In *Proceedings of the 2016 Conference on Empirical Methods in Natural Language Processing*, pages 2383–2392, 2016.
- [10] Radim Řehůřek and Petr Sojka. Software Framework for Topic Modelling with Large Corpora. In *LREC 2010 Workshop on New Challenges for NLP Frameworks*, 2010.
- [11] Amanpreet Singh, Vedanuj Goswami, Vivek Natarajan, Yu Jiang, Xinlei Chen, Meet Shah, Marcus Rohrbach, Dhruv Batra, and Devi Parikh. MMF: A multimodal framework for vision and language research. <https://github.com/facebookresearch/mmf>, 2020.
- [12] Amanpreet Singh, Vivek Natarajan, Meet Shah, Yu Jiang, Xinlei Chen, Devi Parikh, and Marcus Rohrbach. Towards VQA Models That Can Read. In *CVPR*, 2019.
- [13] Ryota Tanaka, Kyosuke Nishida, and Sen Yoshida. Visualmrc: Machine reading comprehension on document images. *arXiv preprint arXiv:2101.11272*, 2021.

| Stage 1 instructions                                                                                                                                                                                                                                                                                                                                                                                                                                                                                                                                                                                                                                                                                                                                                                                                                                                                                                                                                                                                                                                                                                                                                                                                                                                                                                                                                                                                                                                 | Stage 2 instructions                                                                                                                                                                                                                                                                                                                                                                                                                                                                                                                                                                                                                                                                                                                                                                                                                                                                                                                                                                                                                                                                                                                                                                                                                                                                                                                                                                                                                                                                                                                                                                                                                                                                                                                                                                                                                                                                                                                                                                                                                                                                                                                                                                                                                             |
|----------------------------------------------------------------------------------------------------------------------------------------------------------------------------------------------------------------------------------------------------------------------------------------------------------------------------------------------------------------------------------------------------------------------------------------------------------------------------------------------------------------------------------------------------------------------------------------------------------------------------------------------------------------------------------------------------------------------------------------------------------------------------------------------------------------------------------------------------------------------------------------------------------------------------------------------------------------------------------------------------------------------------------------------------------------------------------------------------------------------------------------------------------------------------------------------------------------------------------------------------------------------------------------------------------------------------------------------------------------------------------------------------------------------------------------------------------------------|--------------------------------------------------------------------------------------------------------------------------------------------------------------------------------------------------------------------------------------------------------------------------------------------------------------------------------------------------------------------------------------------------------------------------------------------------------------------------------------------------------------------------------------------------------------------------------------------------------------------------------------------------------------------------------------------------------------------------------------------------------------------------------------------------------------------------------------------------------------------------------------------------------------------------------------------------------------------------------------------------------------------------------------------------------------------------------------------------------------------------------------------------------------------------------------------------------------------------------------------------------------------------------------------------------------------------------------------------------------------------------------------------------------------------------------------------------------------------------------------------------------------------------------------------------------------------------------------------------------------------------------------------------------------------------------------------------------------------------------------------------------------------------------------------------------------------------------------------------------------------------------------------------------------------------------------------------------------------------------------------------------------------------------------------------------------------------------------------------------------------------------------------------------------------------------------------------------------------------------------------|
| <ol style="list-style-type: none"> <li>1. You need to add questions and corresponding answers based on the given image.</li> <li>2. Make sure the questions you ask can be answered solely based on the content in the image</li> <li>3. Try to minimize questions based on textual content. Frame questions that require you to connect multiple elements such as text, structured elements like tables, data visualizations and any other visual elements.</li> <li>4. On infographics with numerical data, try to frame questions that require one to do basic arithmetic, counting or comparisons.</li> <li>5. You are allowed to reject the image if, <ol style="list-style-type: none"> <li>(a) bad resolution images/ illegible text.</li> <li>(b) image is an infographic template with dummy text.</li> <li>(c) content is almost entirely in a non English language.</li> </ol> </li> <li>6. The text which forms your answer must be <ol style="list-style-type: none"> <li>(a) found verbatim in the image as a contiguous sequence of tokens, in the reading order.</li> <li>(b) found verbatim in the question as a contiguous sequence of tokens.</li> <li>(c) formed by multiple text pieces where each 'piece' is found verbatim in the image as contiguous sequence of text tokens. In such a case when you add the answer separate each item by a comma and a white space.</li> <li>(d) a number such as 2, 2.2, 2/2 etc..</li> </ol> </li> </ol> | <ol style="list-style-type: none"> <li>1. You need to enter answer for the questions shown based on the given image</li> <li>2. if you cannot find answer to the question based on the image, flag the question as "can't answer"</li> <li>3. For each question, add the following question-answer types appropriately. There are three categories of question-answer types - Evidence, Operation, and Answer-source. It is possible that a question can have more than one source of answer, more than one type of operation, or more than one type of evidence associated with it. <ol style="list-style-type: none"> <li>(a) Answer source : Following are different types of sources possible: <ol style="list-style-type: none"> <li>i. Image-Span: answer is found verbatim in the image as a contiguous sequence of tokens in the reading order</li> <li>ii. Question-Span: similar to Image-span but found from question.</li> <li>iii. Multi-Span: formed by multiple text pieces where each 'piece' is found verbatim in the image as contiguous sequence of text tokens (i.e, each piece is an Image-span).</li> <li>iv. Non-extractive: answer is a numerical answer and is not found verbatim on the text on the image or the question.</li> </ol> </li> <li>(b) Evidence : Following are different types of evidences possible: <ol style="list-style-type: none"> <li>i. Text: answer is derived by reading text found in the image.</li> <li>ii. Table/List: finding answer requires one to understand a tabular or list type structure.</li> <li>iii. Visual/Layout: requires one to look for visual aspects(colors, names of objects etc.) or layout of the image to arrive at the answer.</li> <li>iv. Figure: requires understanding a figure, a plot, a visualization or a schematic.</li> <li>v. Map: answer is based on a geographical map.</li> </ol> </li> <li>(c) Operation : if answering the question requires one of the following discrete operations: <ol style="list-style-type: none"> <li>i. Counting.</li> <li>ii. Arithmetic: when elementary arithmetic operations (sumsubtractmultiplydivide) are performed.</li> <li>iii. Sorting: when numbers are sorted or compared</li> </ol> </li> </ol> </li> </ol> |

Table A.1: **Annotation instructions.** In addition to the written instructions, workers were trained on the process through webinars. During the webinars, each instruction and annotation policy was explained with the help of multiple examples. This helped the workers get familiarized with the kind of questions and answers that are allowed.

## List of documents to annotate

| Document                                                            | Action |
|---------------------------------------------------------------------|--------|
| 23.covid19-sci.png <i>(checked out)</i>                             |        |
| 4.clothing-masks-infographic--web---part-1.png <i>(checked out)</i> |        |
| 104.covid-19-flyer-what-you-need-to-know-resized.png                |        |
| 21.testing-full20size-pcr-antibody.png                              |        |
| 58.avoiding-covid-19-update-e44657.png                              |        |
| 55.who-workplace-health-l10_slide-2-1200px.png                      |        |
| 78.idea.int2040int_idea2028229.png                                  |        |
| 7.coronavirus-and-hiv-infographic-by-avert.png                      |        |
| 39.covid19-infographic-image.png                                    |        |
| 52.covid19-symptoms.png                                             |        |
| 85.covid-19-pui-milk-in-neonatal-settings2-309x400.png              |        |
| 1.clothing-masks-infographic---web---part-2.png                     |        |
| 13.covid_infographic_4-6-20.png                                     |        |
| 97.impact-retail-sector.png                                         |        |
| 25.620xnjig200003fa.png.pagespeed.ic.rjpxpjzqdq.png                 |        |

Figure A.1: **Images queue for question-answer collection.** The screenshot shows the interface from which a worker picks an image for question-answer collection (stage 1 of annotation). It shows the list of images in the system that are yet to be annotated, and the images that are already opened (checked out) by the particular user. In this case there are two images that are being checked out; the two images shown at the top of the list. Workers were allowed to check out at most 5 images. This feature allows workers to keep documents in pending if they are in doubt.

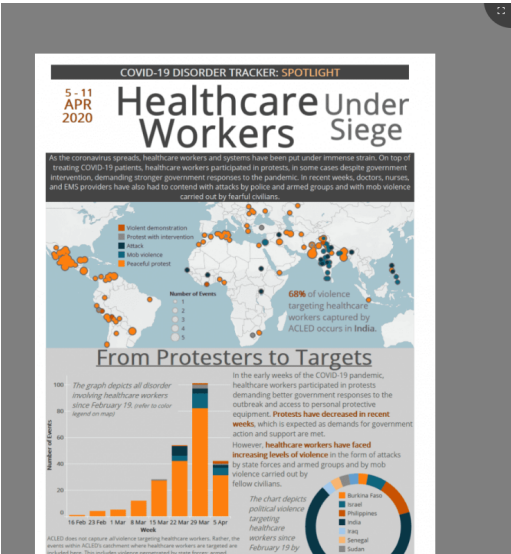

### Questions

In the bar chart what color is used to represent peaceful protest - green, blue, orange or red?

No answers yet.

orange

Cancel Add

Approximately how many events involving healthcare workers occurred in the last week of April?

40

68% of violence targeting healthcare workers was reported in which country?

India

According to the doughnut chart which country reported second highest number of political violence incidents targeting healthcare workers?

Philippines

How many countries are shown in the doughnut chart given below?

8

Which is the southern most country in Africa?

Figure A.2: **First stage of annotation.** Questions and answers are collected at this stage. Image is shown on the left pane with options to zoom, rotate etc. Questions and answers are added on the right pane.

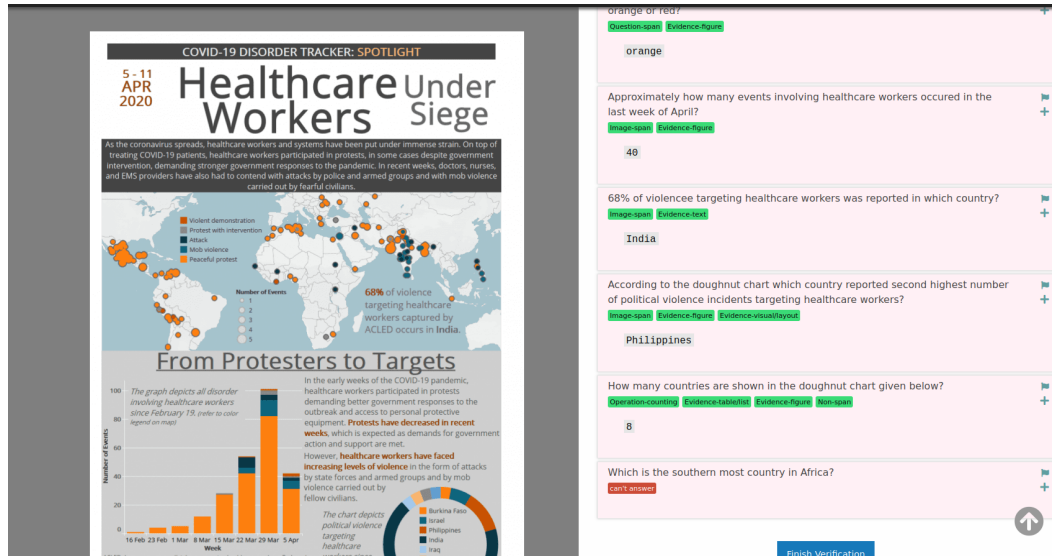

Figure A.3: **Second stage of annotation.** Additional answers and question-answer types are collected for validation and test splits. For one of the questions, answer cannot be found from the image alone and hence the worker assigned a “can’t answer” flag. Such questions are removed from the dataset.

| No. | Topic                                                                                |
|-----|--------------------------------------------------------------------------------------|
| 1   | cost lead increase system non risk energy reduce cause clean                         |
| 2   | war violence symptom domestic potential die injury mil acquire birth                 |
| 3   | health person white black police department doctor respiratory smith officer         |
| 4   | child food water parent potential eat drink essential green sugar already            |
| 5   | death woman age man old adult love likely statistic rate                             |
| 6   | country high account say month report change global survey event                     |
| 7   | social medium job value program find direct authority salary candidate               |
| 8   | first purchase call sport still house kid name bring early                           |
| 9   | case university point physical idea language mass brain thought presentation         |
| 10  | fire act min sunday encounter concentration daily active th monthly                  |
| 11  | paper common check photo add type virus print christmas present                      |
| 12  | game mobile internet app olympic london medal online device mm_mm                    |
| 13  | public right patient human goal influence earth plant face individual                |
| 14  | help free american likely provide need support contact tip hand                      |
| 15  | company school design content employee college technology create offer audience      |
| 16  | new state top city rank york art west east california                                |
| 17  | business customer service population sale product small software increase investment |
| 18  | force industry car line waste register decrease driver victim throw                  |
| 19  | year world people day make time com average number source                            |
| 20  | user use facebook share site video post google search worldwide                      |

Table B.1: **Top 20 topics in InfographicVQA found using LDA.** We used text tokens spotted on the images for topic modelling.

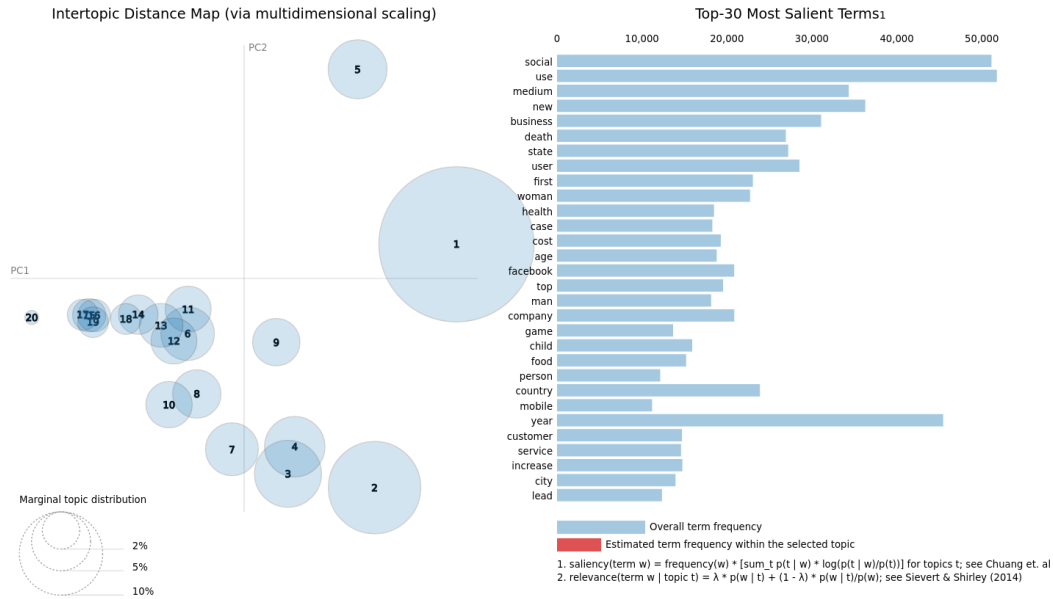

Figure B.1: **Visualization of the top 20 topics in InfographicVQA dataset.** We used LDA to find the topics. On the left is an inter topic distance map where each circle represent a topic. The area of the circles is proportional to the overall relevance of the topic. Distance between two topics are computed using Jensen–Shannon divergence. The distances are then mapped to two dimensional space using Multidimensional Scaling [4]. On the right we show top 30 most salient terms(most prevalent terms in the entire corpus) among the text present on the images. This diagram was created using pyLDAvis tool.

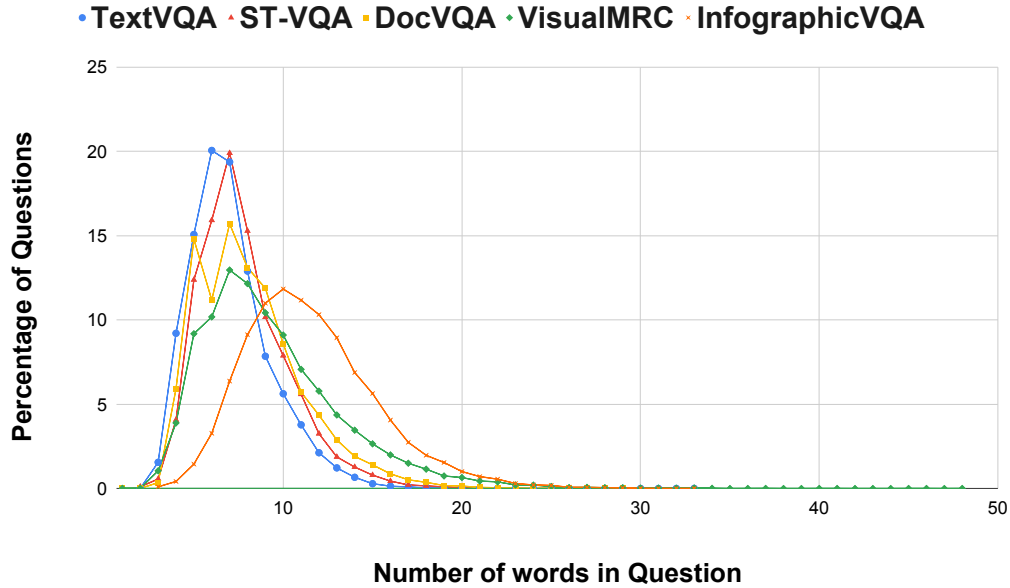

Figure B.2: **Percentage of questions with a particular length.** Compared to other similar datasets, questions in InfographicVQA are longer on average. Average question length is 11.54 ( Table 2 in the main paper), which is highest among similar datasets including VisualMRC, which is an abstractive QA dataset.

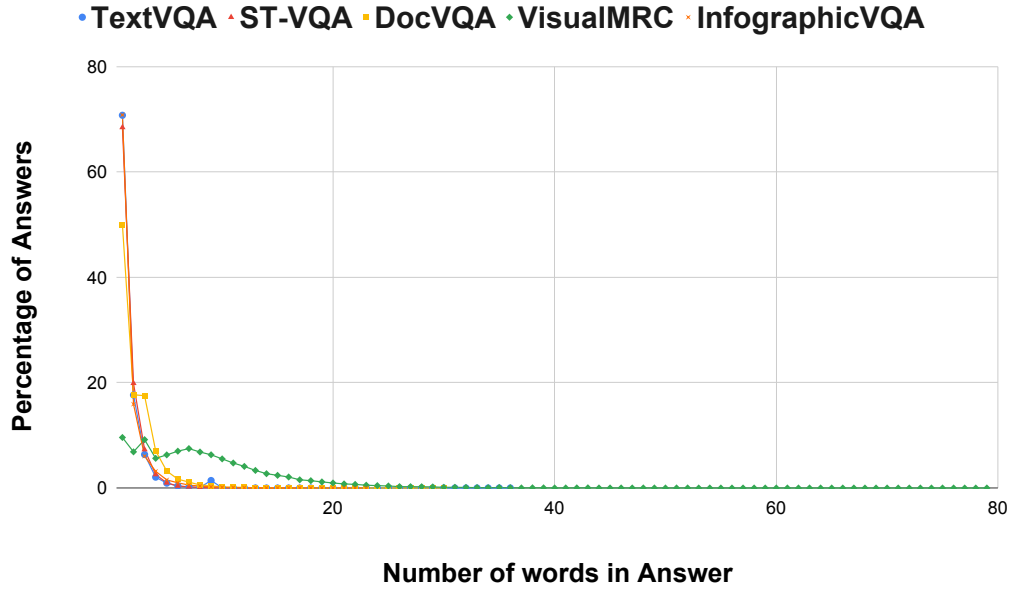

Figure B.3: **Percentage of answers with a particular length.** Answers in InfographicVQA are shorter compared to most of the similar datasets. More than 70% of the answers have only single word in it and more than 85% have at most 2 words in it. This is expected since the questions are asked on data presented on infogrphics, which is mostly numerical data.

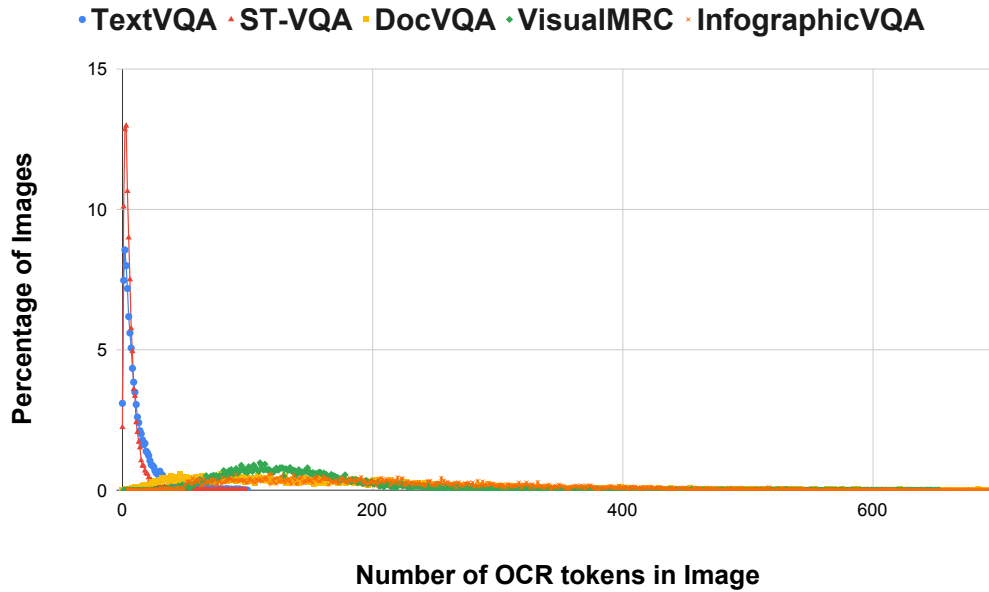

Figure B.4: **Percentage of images with a particular number of text tokens on it.** Average number of text tokens per image is highest in InfographicVQA (Table 2 in the main paper). It can be seen from the plot that InfographicVQA has a flatter curve with a longer tail.

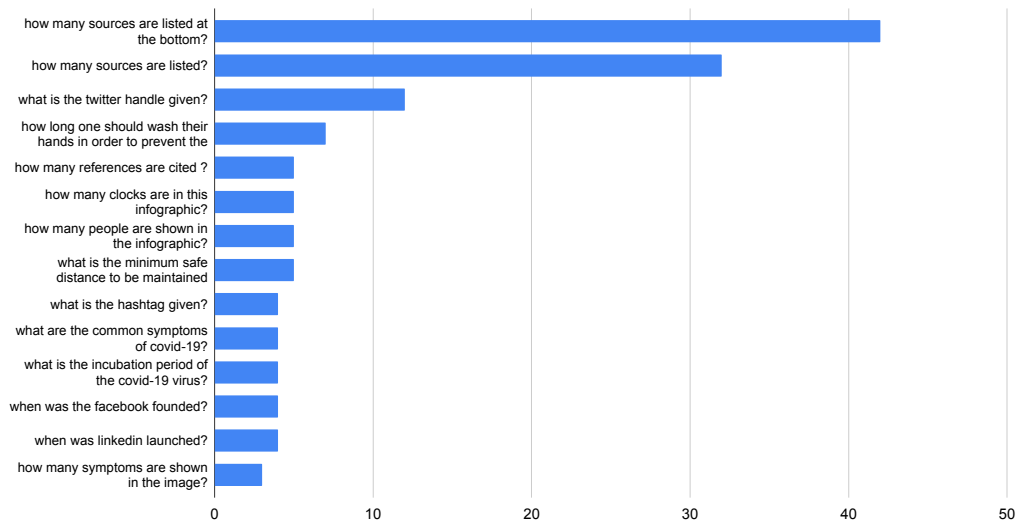

Figure B.5: **Top 15 questions.** A majority of commonly occurring questions concern with counting.

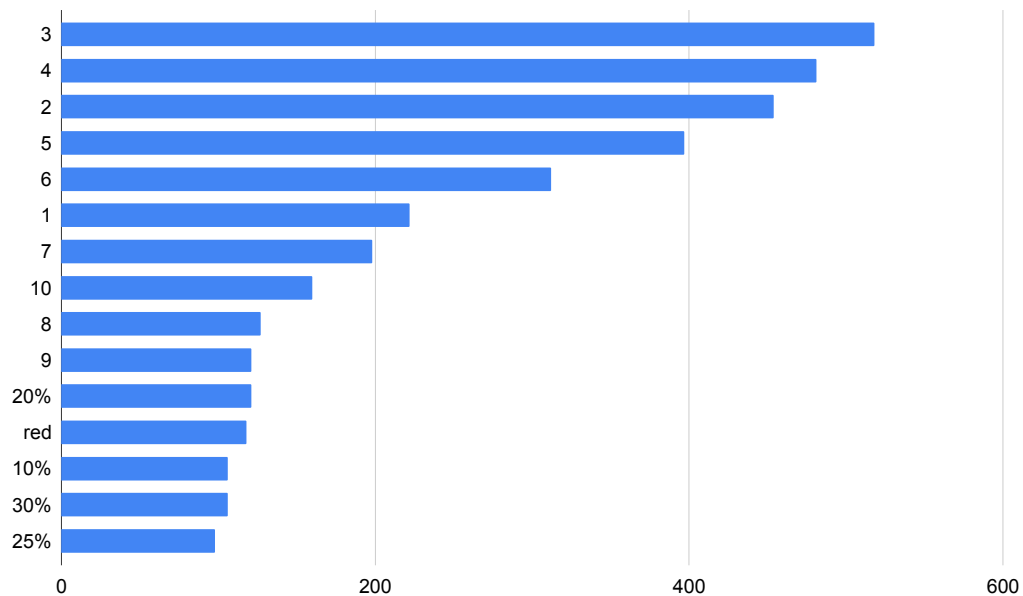

Figure B.6: **Top 15 answers.** Almost all of the top answers are numeric answers.

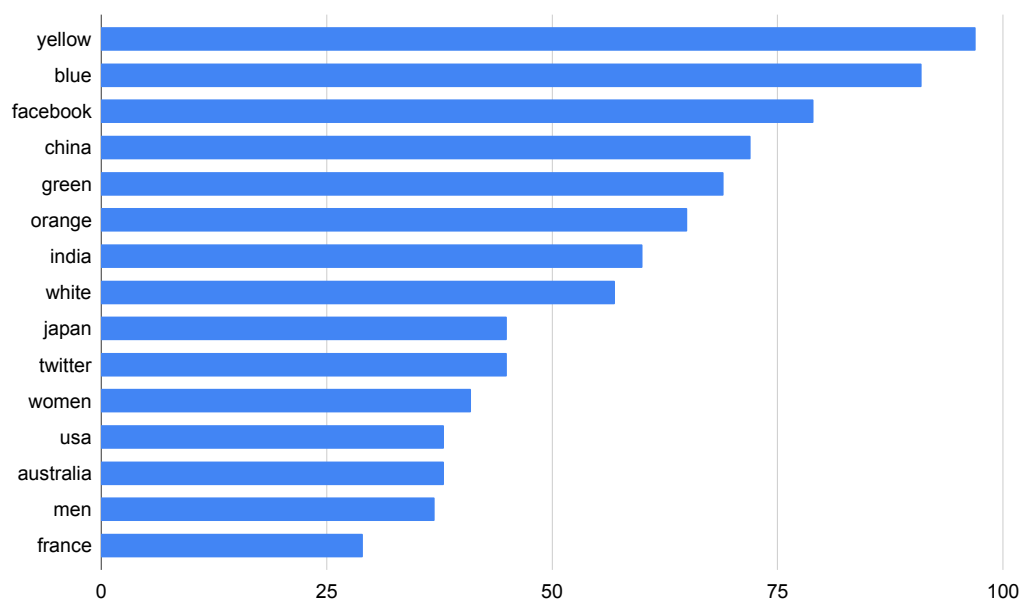

Figure B.7: **Top 15 non-numeric answers.** Non numeric answers are dominated by names of countries, names of colors and names of social media platforms.

## Gender in the Global Research Landscape

Elsevier's comprehensive report on research performance through a gender lens, *Gender in the Global Research Landscape*, spans 20 years, 12 geographies, and 27 disciplines. This global study draws upon data and analytics, a unique gender disambiguation methodology, and involvement of global experts.

### FOCUS ON COMPUTER SCIENCES

Women Men

#### Researchers

Proportion of women and men among researchers in Computer Sciences 2011-15

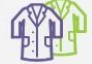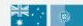

In Australia and Portugal, women account for more than a quarter of named authors in Computer Science.

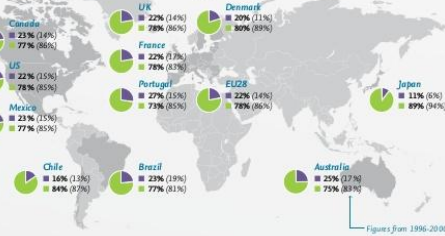

#### Leadership

Appearance of authors in first or corresponding position for papers in Computer Science 2011-15

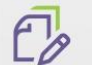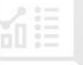

Comparator countries with the Least pronounced gender difference in first/ corresponding authorship – percentage points between women & men

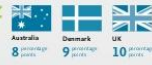

Most pronounced difference

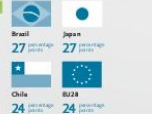

\*Field-Weighted Citation Impact normalizes the data to a world average of 1 in order to account for different citation rates and practices across author, field, type, and age. *Answer the following questions about research in intelligence and security* Elsevier is a registered trademark of Elsevier B.V. | RESEARCH and the RE symbol are trademarks of RESEARCH and/or its subsidiaries. © 2018 Elsevier B.V.

Powered by Scopus

#### Research Collaboration

Collaboration and Field-Weighted Citation Impact\* in Computer Science 2011-15

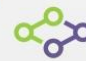

Comparator countries where women have a slightly higher rate of academic-corporate collaboration

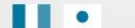

Comparator countries where women's academic-corporate collaborations have a slightly higher citation impact

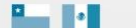

Across comparators, women tend to have lower rates of international and academic-corporate collaborations than men in Computer Science. France and Japan are exceptions, with women publishing a slightly larger proportion of their scholarly output in collaboration between academic and corporate sectors, compared to men.

Across comparators, a larger proportion of women's scholarly output belong to the most interdisciplinary papers.

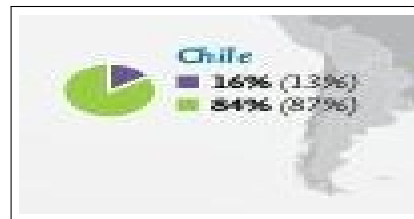

Q: what percent of researchers in Chile were men in the duration of 2011-15?

GT: [84%, 84]

LayoutLM: 23%

M4C: 23%

Human: 84%

Answer-source: Image-span

Evidence: Map

Operation: none

Figure D.1: **Using color codes and information on a Map to arrive at answer.** To answer this question, models require to understand that the blue color correspond to women and then pick the number corresponding to the blue color from the data given for Chile. Both the baseline models get this question wrong. Note that here there are two valid answers (GT), one added during the first stage of annotation and the other during the second stage.

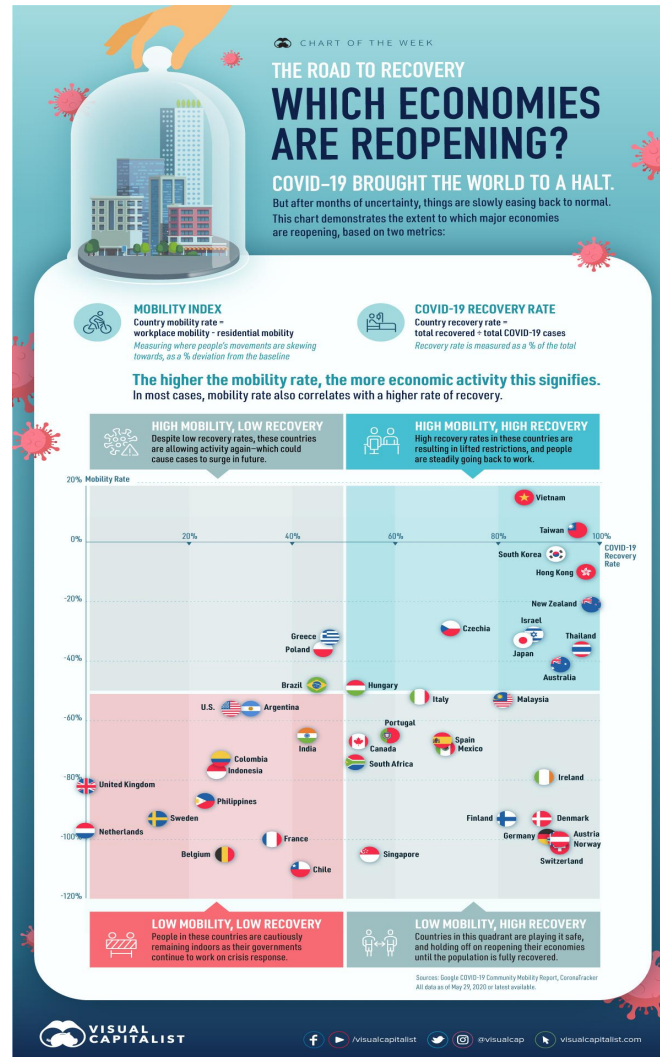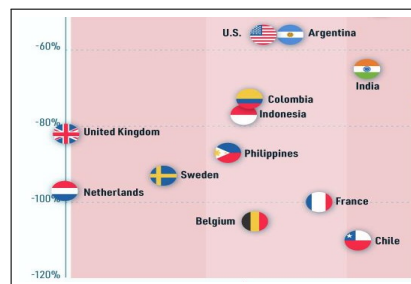

Q: Which quadrant does the country India fall into, blue, pink, or gray?

GT: pink

LayoutLM: country

M4C: pink

Human: pink

Answer-source: Question-span

Evidence: Figure Visual/Layout

Operation: none

Figure D.2: Answer is a color name which is given as a multiple choice option in the question. To answer this question, a model needs to first locate "India" on the image and then identify the background color there. M4C gets this question correct.

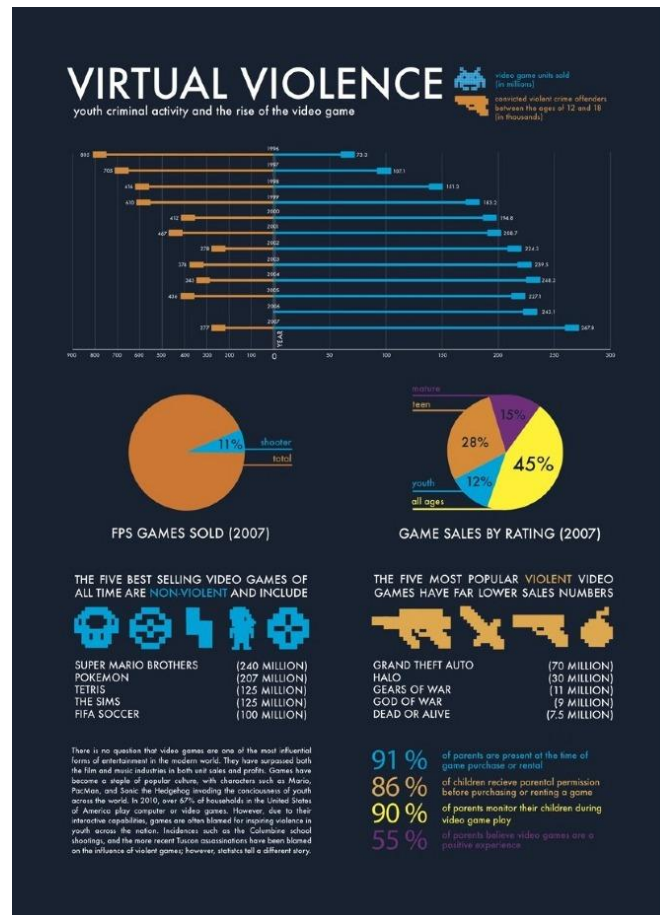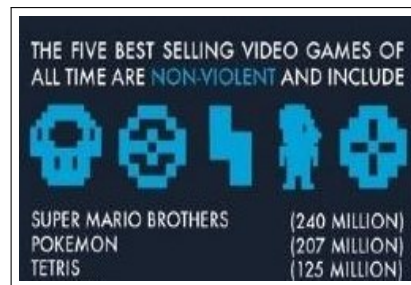

Q: Which are the top 2 best selling non violent video games of all time?

GT: **super mario brothers, pokemon**

LayoutLM: **super mario brothers**

M4C: **instagram youth**

Human: **super mario brothers, pokemon**

Answer-source: **Multi-span**

Evidence: **Table/List**

Operation: **Sorting**

Figure D.3: **Multi-Span answer.** Multi-span answer type allows us to include questions where answer is formed by multiple single ‘span’s. In this example top 2 items in a category need to be found. This can only be answered if we allow answers containing multiple spans. Since the LayoutLM-based model we train for extractive QA can handle only single spans, it gets first part of the answer correct.

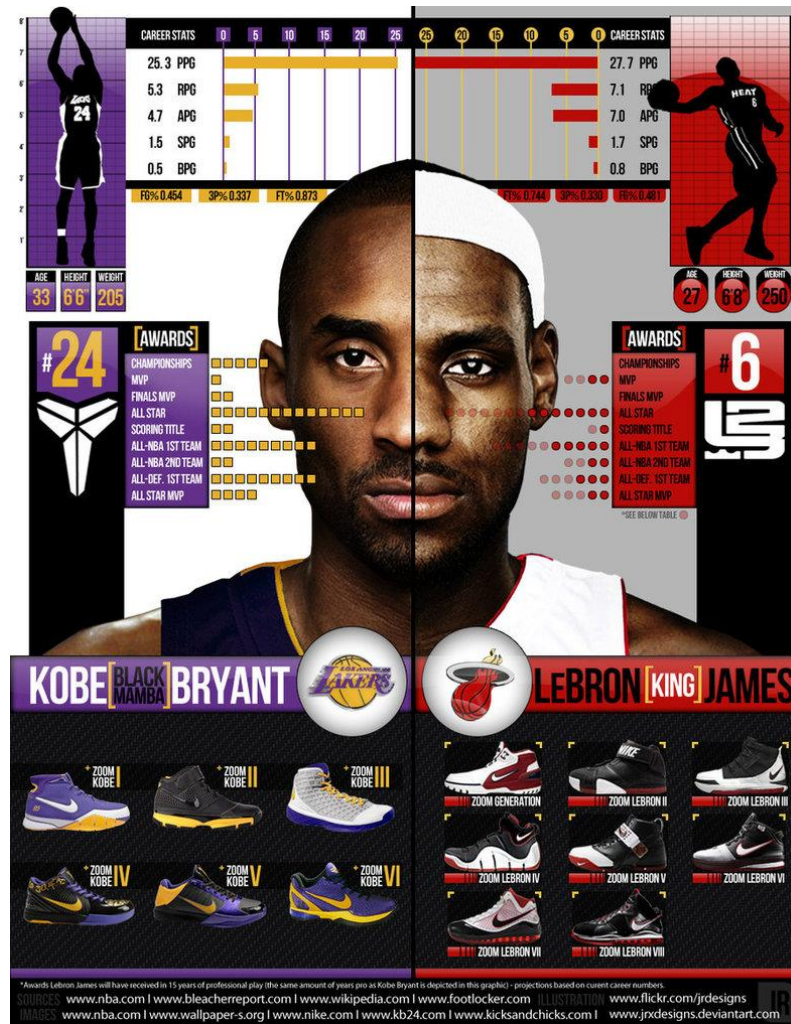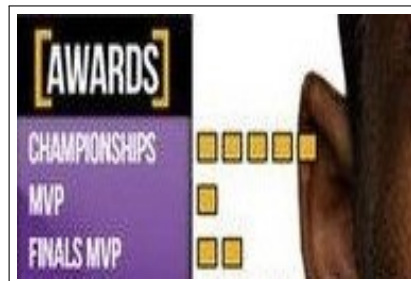

Q: How many championships has Kobe Bryant won?

GT: 5

LayoutLM: 5

M4C: 5

Human: 5

Answer-source: Non-extractive

Evidence: Figure

Operation: Counting

Figure D.4: **Counting symbols/markers to find an answer.** Both the models get the answer correct for this question that require one to count the yellow squares next to "CHAMPIONSHIPS".

## How the first COVID-19 lockdowns have affected European drug use

European Web Survey on Drugs, April-May 2020

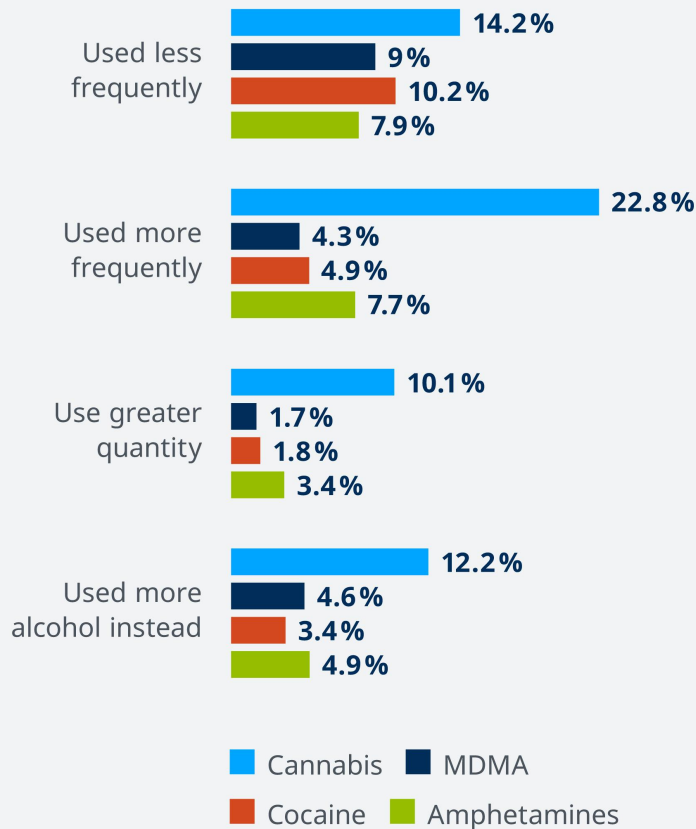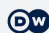

Source: EWSD / EMCDDA

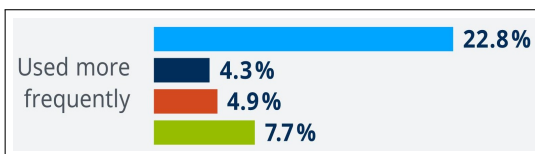

**Q:** Which drug was used more frequently during lockdown, MDMA, Cocaine, Cannabis, or Amphetamines?

**GT:** cannabis

**LayoutLM:** cannabis

**M4C:** cocaine

**Human:** cannabis

**Answer-source:** Question-span

**Image-span**

**Evidence:** Figure

**Operation:** Sorting

Figure D.5: **Sorting values shown in a bar chart.** In this question, answer is a span of question (Question-span) and a span of the text on the image (Image-span) as well. The largest among the given items is explicit in the bar chart representation. Alternatively the same can be found by finding the largest by comparing the numbers. Hence 'Sorting' is added as the Operation.

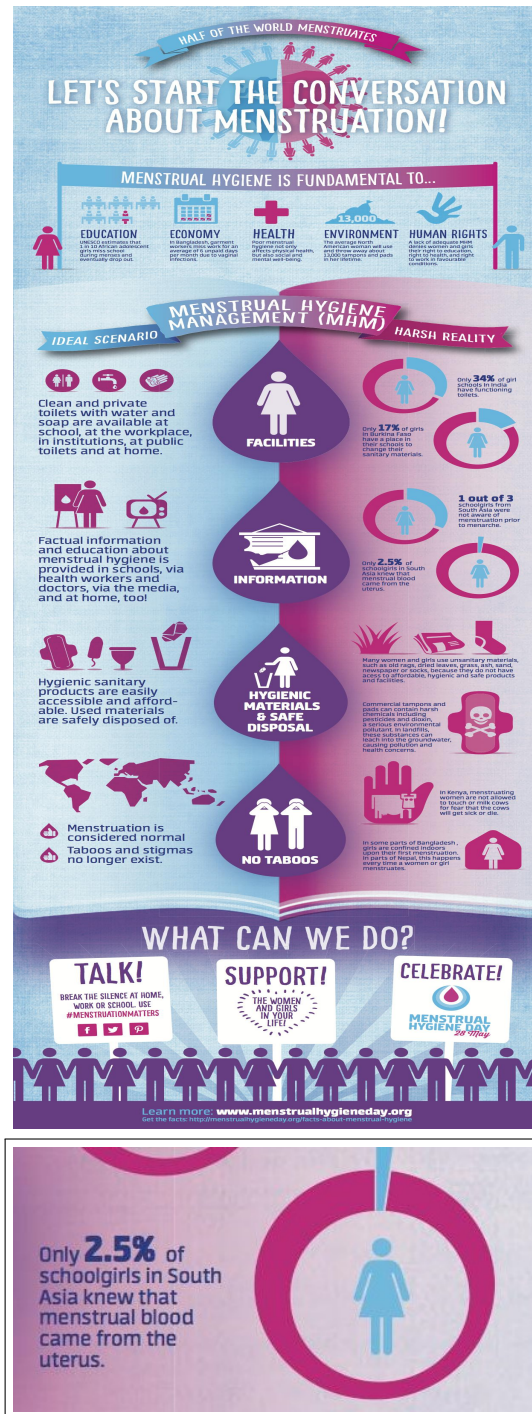

**Q:** What % of schoolgirls in South Asia do not know that menstrual blood comes from the uterus?

**GT:** [97.5, 97.5%]

**LayoutLM:** 2.5%

**M4C:** 25

**Human:** 97.5%

**Answer-source:** Non-extractive

**Evidence:** Text

**Operation:** Arithmetic

Figure D.6: **Question requiring arithmetic operation.** To answer this question, the given percentage value needs to be subtracted from 100. Both the models fail to get the answer correct.

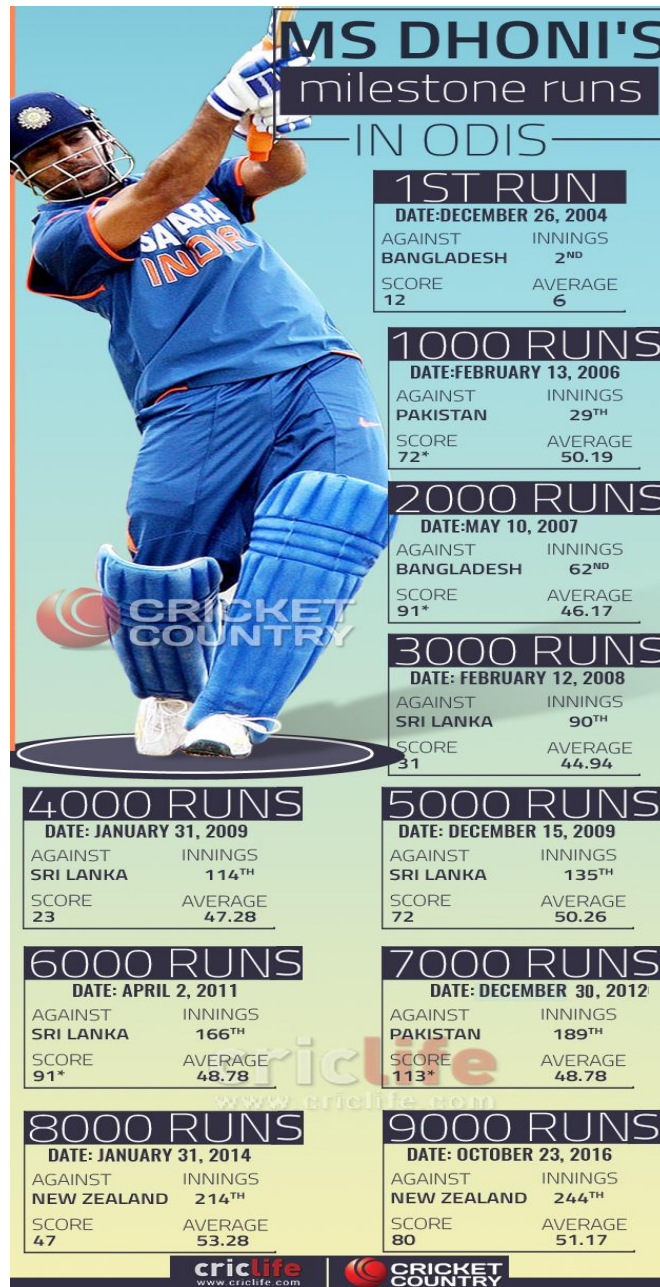

**Q:** Playing against which country did he reach the most number of his milestone runs?

**GT:** sri lanka

**LayoutLM:** bangladesh

**M4C:** pakistan

**Human:** sri lanka

**Answer-source:** Image-span

**Evidence:** Text Figure

**Operation:** Counting Sorting

Figure D.7: **Performing multiple discrete operations.** Here the context required to find the answer spans the entire image. Hence we do not show a crop of the image in the inset. This question requires a model to do Counting — count number of milestone runs scored against each country and then perform Sorting — find the country against which the player scored most milestone runs.
